# Supplementary material
Source: MDPI journal article supplement (https://www.mdpi.com/1424-8247/14/5/478)
Supplement: s1 [file s1]

# Metronomic 5-fluorouracil delivery primes skeletal muscle for myopathy but does not cause cachexia

Dean G. Campelj<sup>1,2</sup>, Cara A. Timpani<sup>1,2,3</sup>, Tabitha Cree<sup>1,2</sup>, Aaron C. Petersen<sup>1,2</sup>, Alan Hayes<sup>1,2,3</sup>, Craig A. Goodman<sup>1,2\*</sup> and Emma Rybalka<sup>1,2,3\*</sup>

<sup>1</sup> Institute for Health and Sport, Victoria University, Melbourne, Victoria, Australia; dean.campelj@live.vu.edu.au; cara.timpani@vu.edu.au; tabitha.cree@live.vu.edu.au; aaron.petersen@vu.edu.au

<sup>2</sup> Australian Institute for Musculoskeletal Science (AIMSS), Inherited and Acquired Myopathy Program, Victoria University, St Albans, Victoria, Australia; emma.rybalka@vu.edu.au

<sup>3</sup> Department of Medicine - Western Health, Melbourne Medical School, The University of Melbourne, Melbourne, Victoria, Australia; alan.hayes@vu.edu.au

<sup>4</sup> Centre for Muscle Research (CMR), Department of Physiology, The University of Melbourne, Parkville, Victoria, Australia; craig.goodman@unimelb.edu.au

\* Correspondence: emma.rybalka@vu.edu.au, craig.goodman@unimelb.edu.au

**Table. S1 Organ to body mass ratios.** Various organs from all treatment groups were surgical excised and weighed at the end of the treatment period.  $n=7-8$ .

|               | Organ/Body Mass Ratio (mg/g) |                 |                  |
|---------------|------------------------------|-----------------|------------------|
|               | VEH                          | 5FU             | 5FU+BGP          |
| <b>Kidney</b> | $8.70 \pm 0.26$              | $8.96 \pm 0.26$ | $8.40 \pm 0.21$  |
| <b>Spleen</b> | $3.82 \pm 0.07$              | $4.14 \pm 0.18$ | $3.87 \pm 0.11$  |
| <b>Liver</b>  | $54.18 \pm 0.83$             | $54.5 \pm 2.00$ | $49.61 \pm 1.68$ |
| <b>Lungs</b>  | $7.05 \pm 0.07$              | $7.09 \pm 0.16$ | $7.17 \pm 0.22$  |
| <b>Heart</b>  | $5.21 \pm 0.10$              | $5.46 \pm 0.45$ | $5.33 \pm 0.22$  |

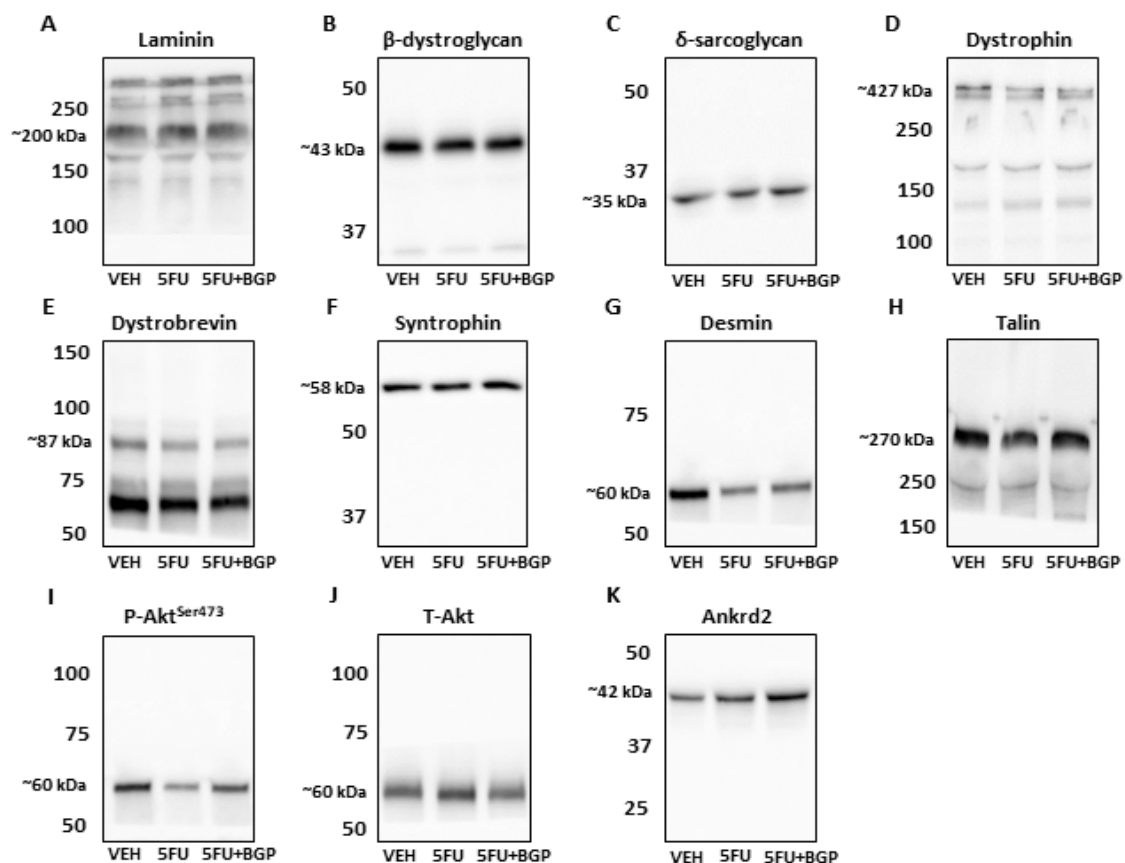

**Fig. S1 Full-length Western blot images relating to the skeletal muscle homogenate data presented in Fig. 3.** After transferring the protein from the gel to the PVDF membrane, membranes were cut horizontally to allow for probing with multiple primary antibodies on a single membrane/gel. Subsequently, the above images display the largest available vertical membrane area probed with each respective primary antibody.

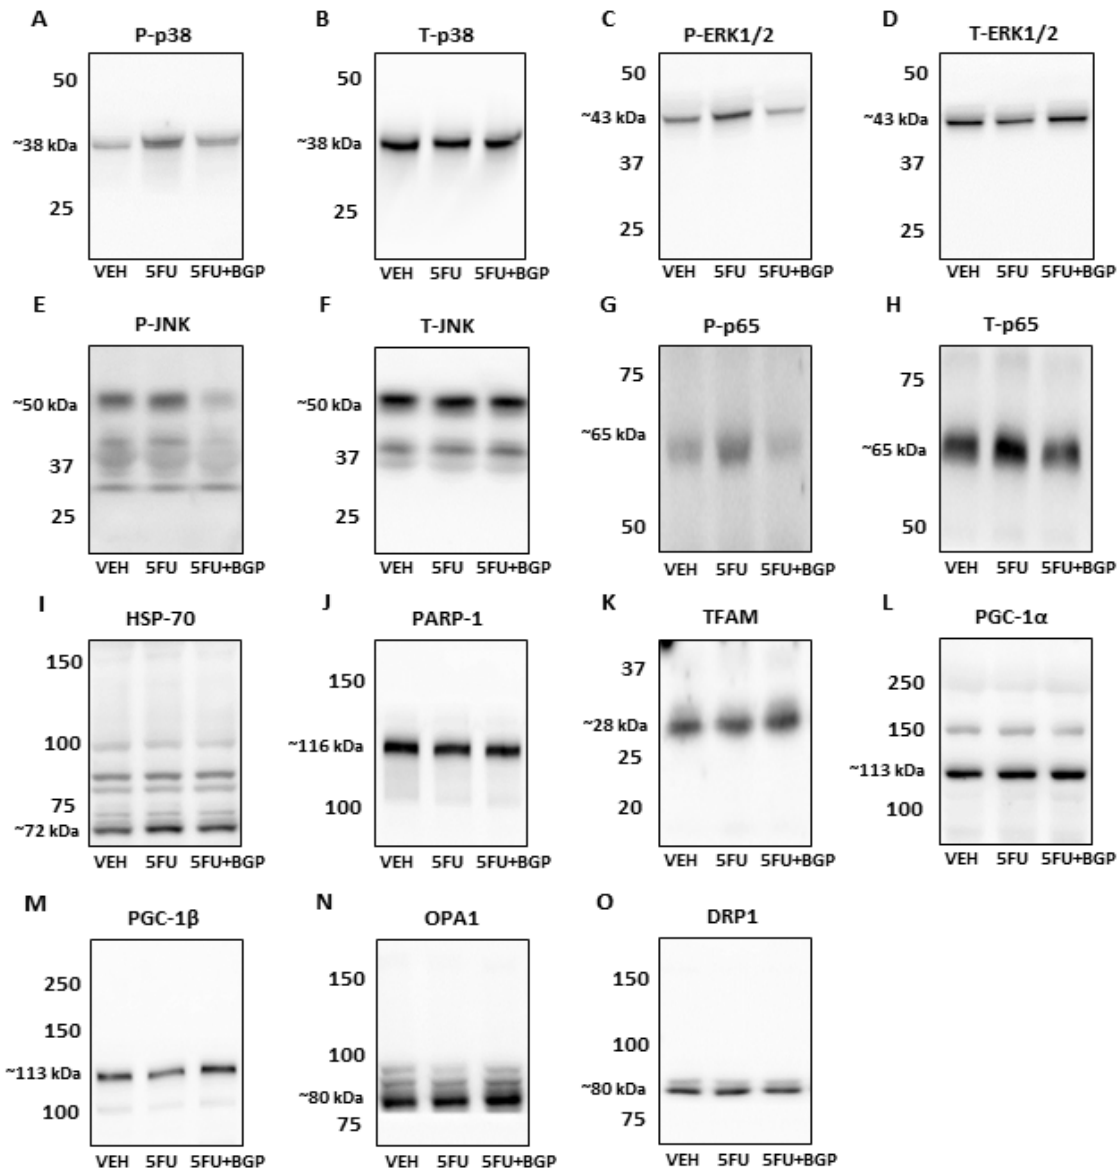

**Fig. S2 Full-length Western blot images relating to the skeletal muscle homogenate data presented in Fig. 4 and 5.** After transferring the protein from the gel to the PVDF membrane, membranes were cut horizontally to allow for probing with multiple primary antibodies on a single membrane/gel. Subsequently, the above images display the largest available vertical membrane area probed with each respective primary antibody.

**Table. S2 Densitometry summary data from representative Western blot images.** Data is presented as integrated density relative to total protein (in arbitrary units, i.e. (a.u.)) for all antibodies analysed.

| Target Protein          | Protein/Total Protein (a.u.) |        |         | Target Protein | Protein/Total Protein (a.u.) |       |         |
|-------------------------|------------------------------|--------|---------|----------------|------------------------------|-------|---------|
|                         | VEH                          | 5FU    | 5FU+BGP |                | VEH                          | 5FU   | 5FU+BGP |
| P-Akt <sup>Ser473</sup> | 36.14                        | 16.18  | 27.75   | Laminin        | 43.59                        | 45.55 | 42.90   |
| T-Akt                   | 103.68                       | 123.27 | 131.06  | OPA1           | 22.14                        | 23.63 | 27.59   |
| Ankrd2                  | 16.21                        | 17.65  | 27.12   | P-p38          | 20.31                        | 53.45 | 31.70   |
| Desmin                  | 7.26                         | 5.08   | 4.31    | T-p38          | 94.01                        | 96.11 | 105.17  |
| DRP1                    | 15.35                        | 16.42  | 15.35   | P-p65          | 4.96                         | 6.27  | 4.67    |
| Dystrobrevin            | 3.74                         | 3.90   | 4.73    | T-p65          | 17.43                        | 14.23 | 16.02   |
| β-Dystroglycan          | 16.22                        | 14.70  | 14.55   | PARP-1         | 45.07                        | 38.80 | 36.58   |
| Dystrophin              | 9.55                         | 6.56   | 5.95    | PGC-1α         | 14.92                        | 17.37 | 16.15   |
| P-ERK1/2                | 28.08                        | 45.25  | 17.20   | PGC-1β         | 26.16                        | 30.40 | 32.06   |
| T-ERK1/2                | 81.14                        | 65.68  | 89.88   | δ-Sarcoglycan  | 8.74                         | 7.18  | 9.07    |
| HSP-70                  | 6.10                         | 7.25   | 6.28    | Syntrophin     | 10.81                        | 10.47 | 11.86   |
| P-JNK                   | 18.04                        | 18.54  | 9.78    | Talin          | 36.50                        | 33.60 | 31.84   |
| T-JNK                   | 40.68                        | 38.06  | 41.52   | TFAM           | 12.92                        | 12.77 | 15.30   |

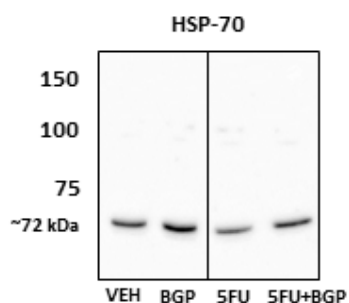

| Protein/Total Protein (a.u.) |      |      |      |         |
|------------------------------|------|------|------|---------|
| Target Protein               | VEH  | BGP  | 5FU  | 5FU+BGP |
| HSP-70                       | 3.67 | 5.52 | 2.87 | 4.24    |

**Fig. S3 Full-length Western blot images relating to the C2C12 myotube cell lysate data presented in Fig. 6.** After transferring the protein from the gel to the PVDF membrane, membranes were cut horizontally to allow for probing with multiple primary antibodies on a single membrane/gel. Subsequently, the above images display the largest available vertical membrane area probed with each respective primary antibody.
